# Supplementary material for: Permafrost Carbon and CO2 Pathways Differ at Contrasting Coastal Erosion Sites in the Canadian Arctic
Source: Frontiers journal article supplement (doi:10.3389/feart.2021.630493), 2021-03-26
Supplement: Data_Sheet_1.pdf [file Data_Sheet_1.pdf]

## Supporting information

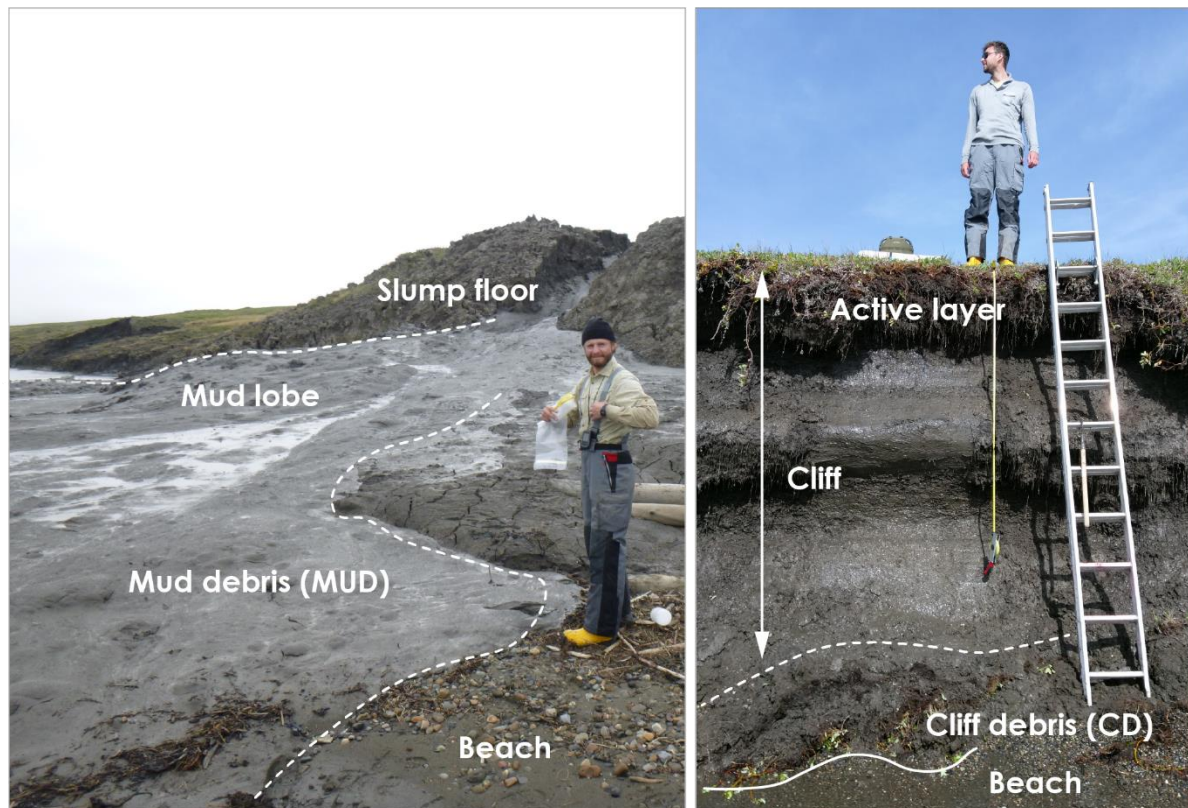

**Figure S1.** Study sites and sampling locations on Qikiqtaruk – Herschel Island. A mud lobe draining a retrogressive thaw slump system (left panel) and cliff debris from a low cliff (right panel) were sampled. *Mud debris* (MUD) and *cliff debris* (CD) were used for incubations.

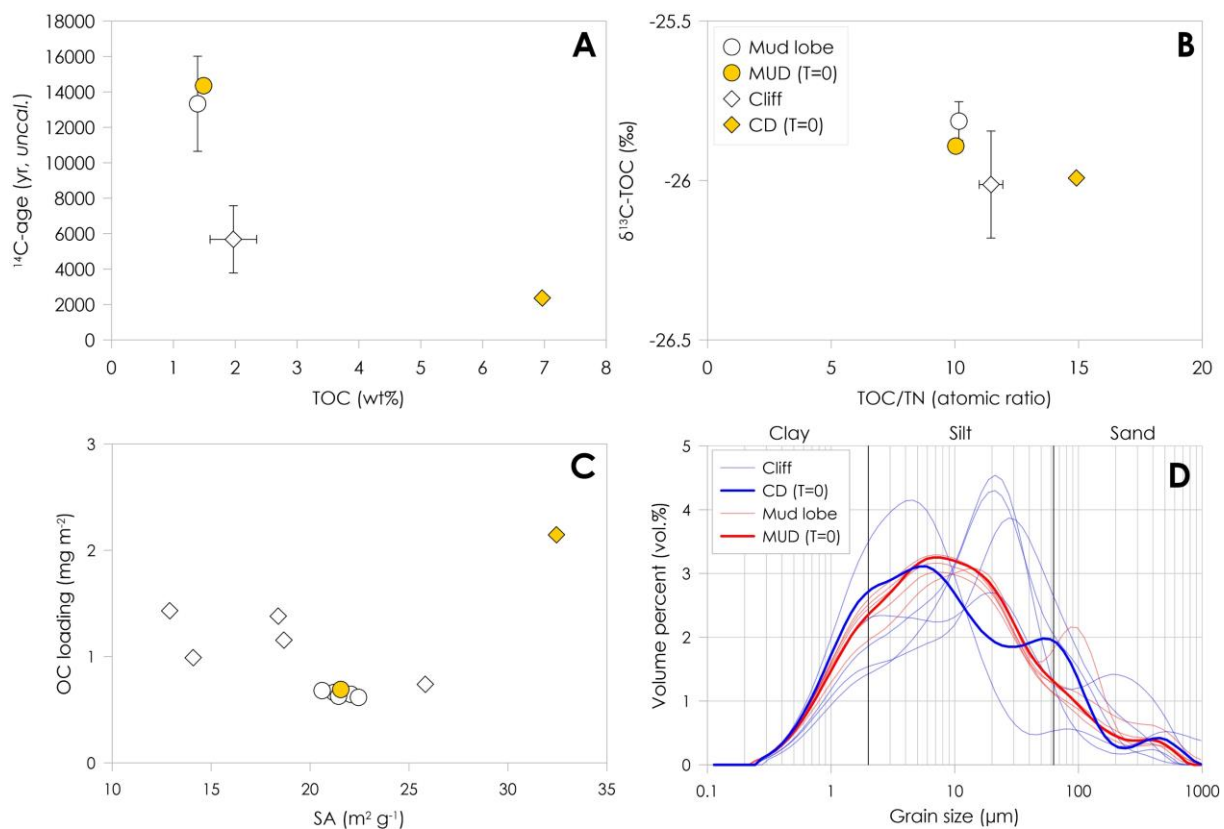

**Figure S2.** Composition and age of organic carbon at the permafrost coastal erosion sites. *Mud debris* (MUD) and *cliff debris* (CD) were used for the incubation ( $T = 0$ ).

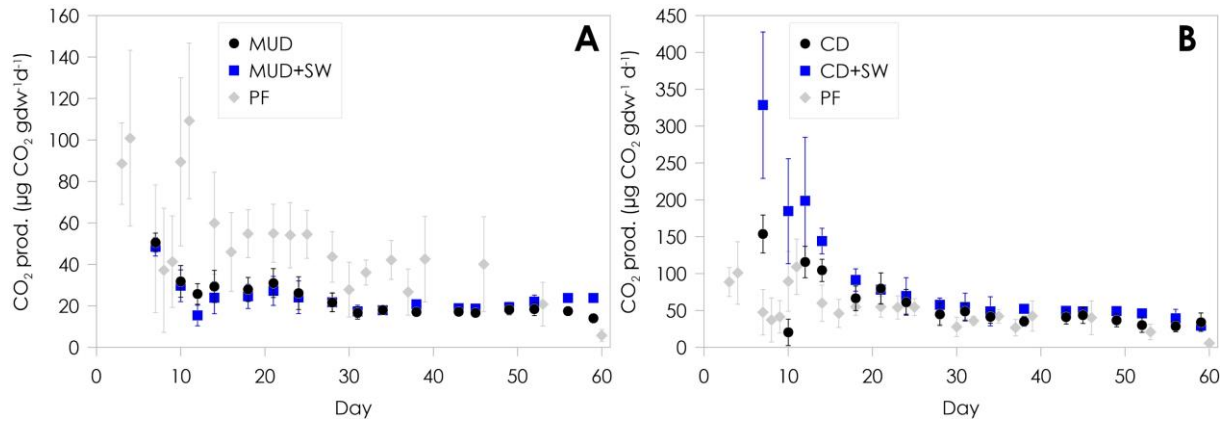

**Figure S3.** Aerobic CO<sub>2</sub> production rates from incubated *mud debris* and *cliff debris*. *Mud debris* (MUD) and *cliff debris* (CD) were incubated without and with seawater (SW) for a duration of two months at 4 °C under aerobic and dark conditions. Cumulative CO<sub>2</sub> production from permafrost (PF) is displayed as a local reference for CO<sub>2</sub> production from *in situ* permafrost (Tanski et al., 2019). The PF samples originate from the headwall of the thaw slump system from which the *mud debris* is released.

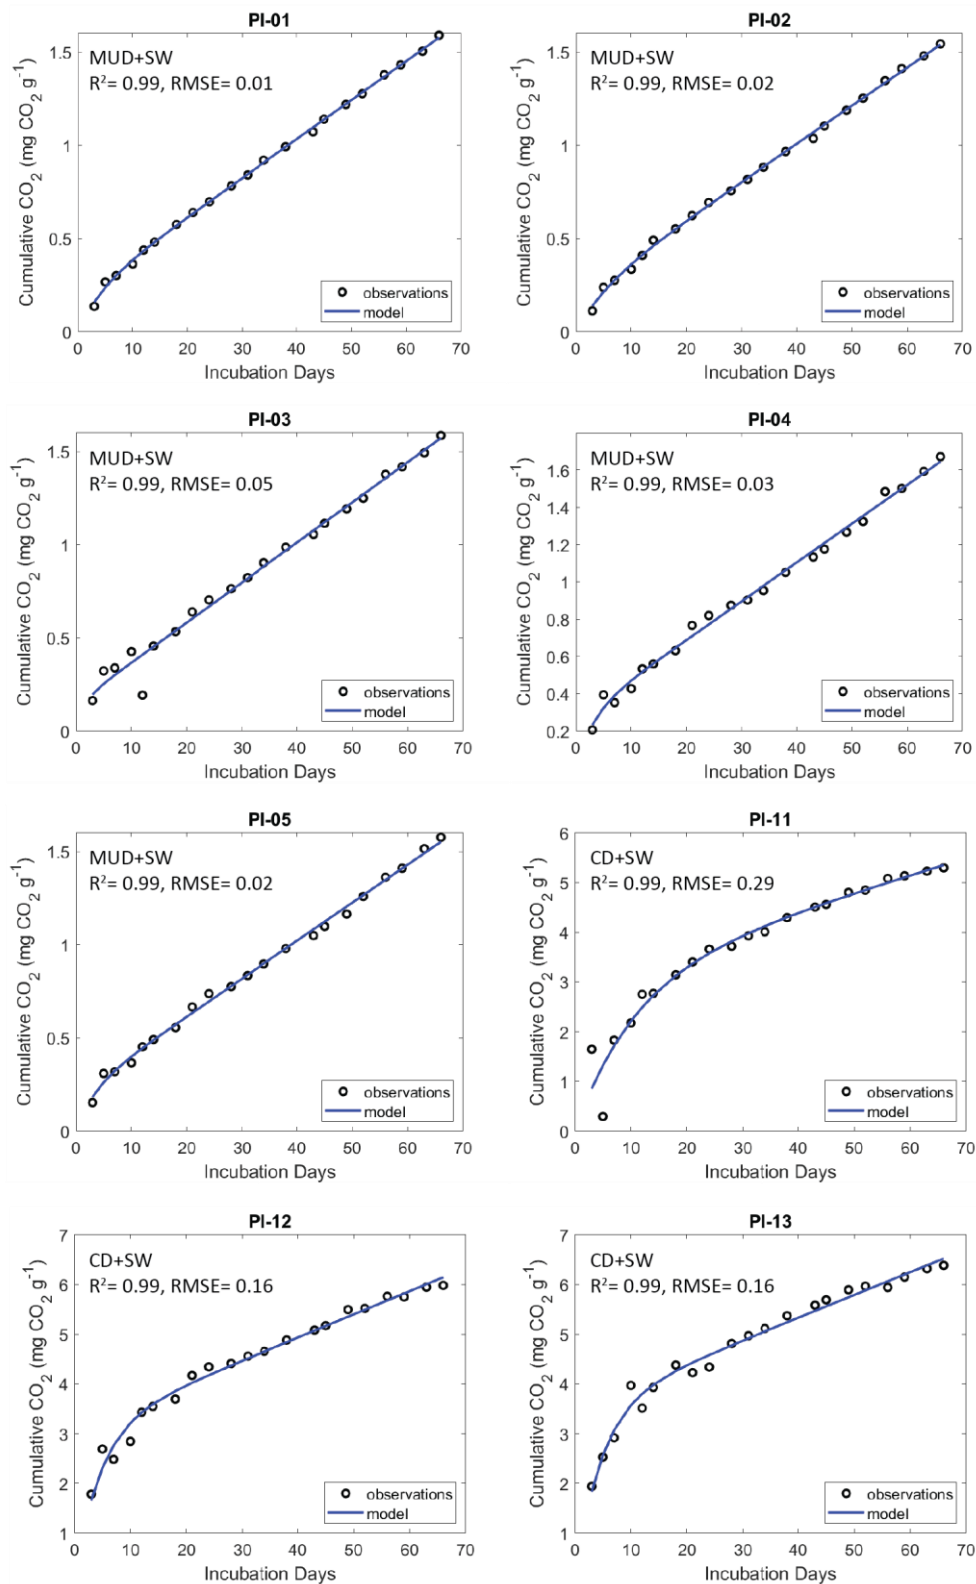

**Figure S4.** Observed and modelled cumulative CO<sub>2</sub> production for incubation set-ups with *mud debris* (MUD) and *cliff debris* (CD) mixed with *seawater* (SW). Model curve is a logarithmic fit reported with correlation coefficient ( $R^2$ ) and root-mean-square error (RSME) given in mg CO<sub>2</sub> per gram dry weight (g<sup>-1</sup>).

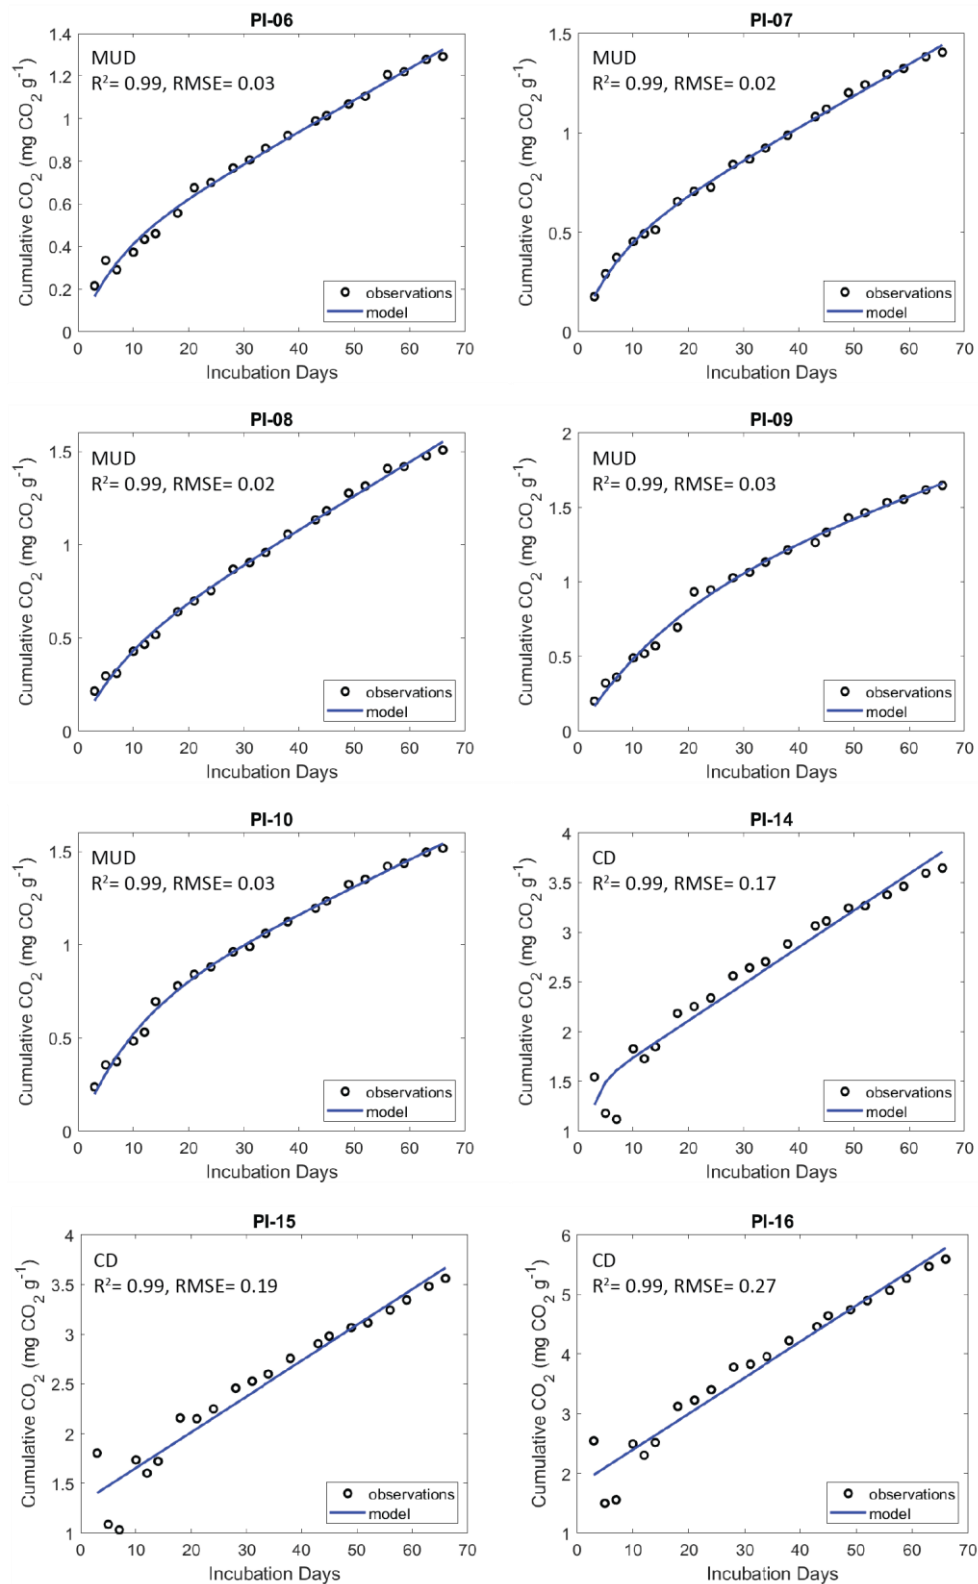

**Figure S5.** Observed and modelled cumulative CO<sub>2</sub> production for incubation set-ups with *mud debris* (MUD) and *cliff debris* (CD). Model curve is a logarithmic fit reported with correlation coefficient ( $R^2$ ) and root-mean-square error (RSME) given in mg CO<sub>2</sub> per gram dry weight (g<sup>-1</sup>).

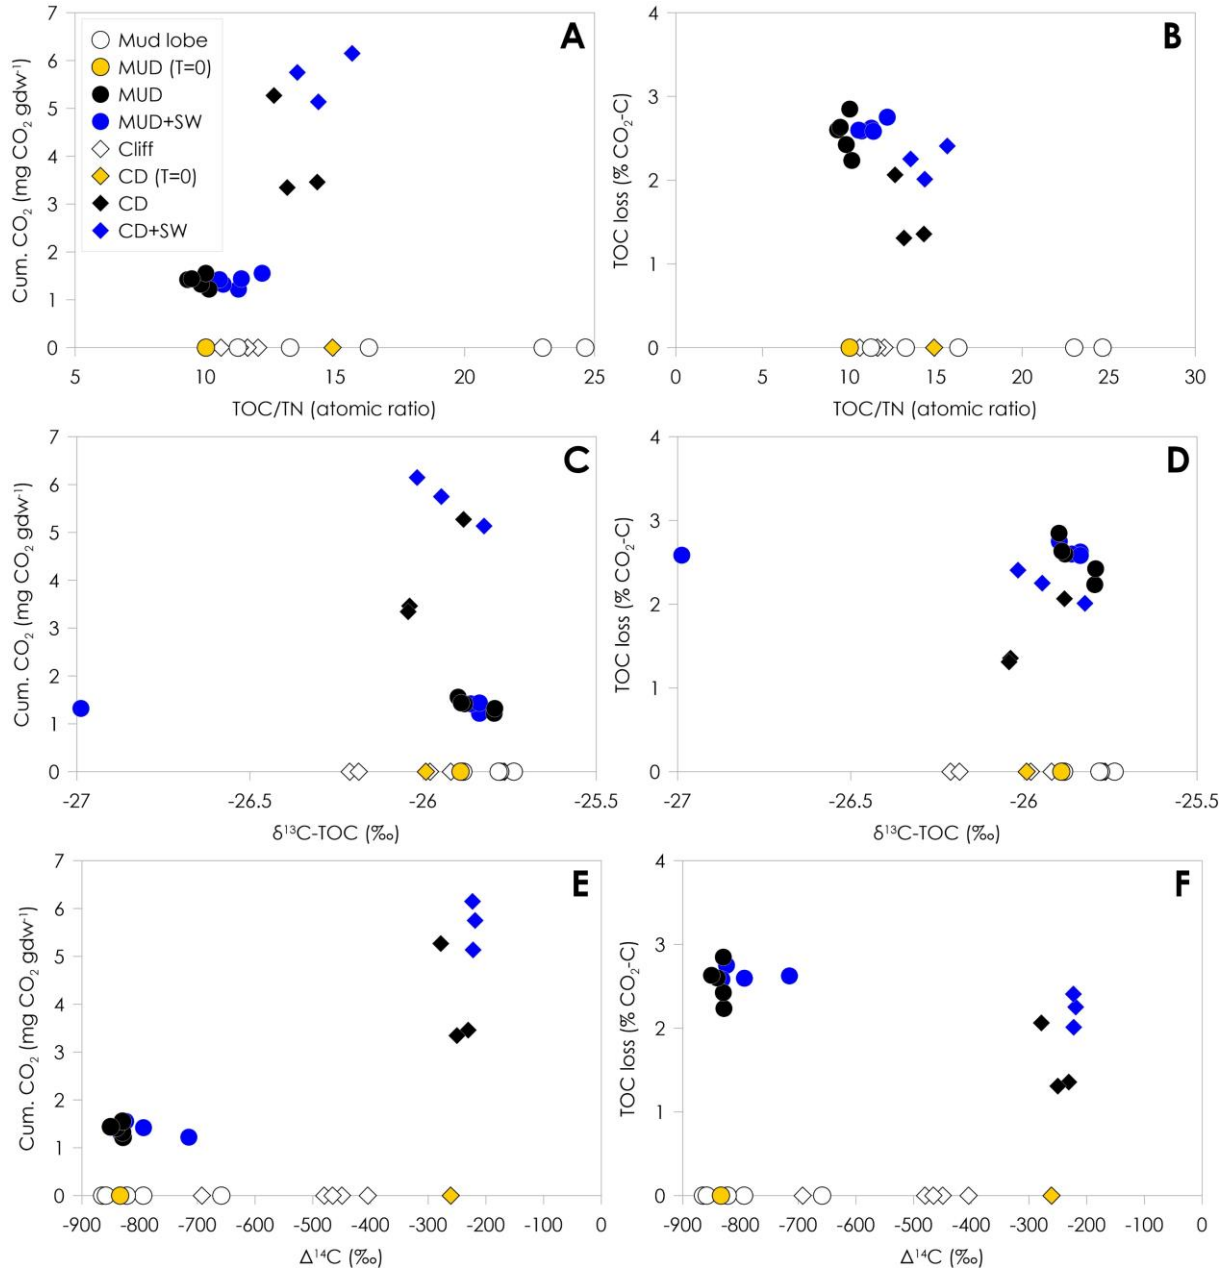

**Figure S6.** CO<sub>2</sub> production normalized to gram dry weight (gdw) and %TOC loss as CO<sub>2</sub>-C plotted against TOC/TN-ratio (A, B),  $\delta^{13}\text{C}$ -TOC (C, D) and  $\Delta^{14}\text{C}$  (E, F) as indicators for organic matter degradation. Open symbols on the x-axis indicate samples from *mud lobe* and *cliff* that were not incubated to show the natural variability in the *mud lobe* and *cliff*. The *mud debris* (MUD) and *cliff debris* (CD) samples used for the incubation (T = 0) are indicated by the yellow symbols, incubated samples by the black symbols and incubated samples with seawater (SW) added by the blue symbols.

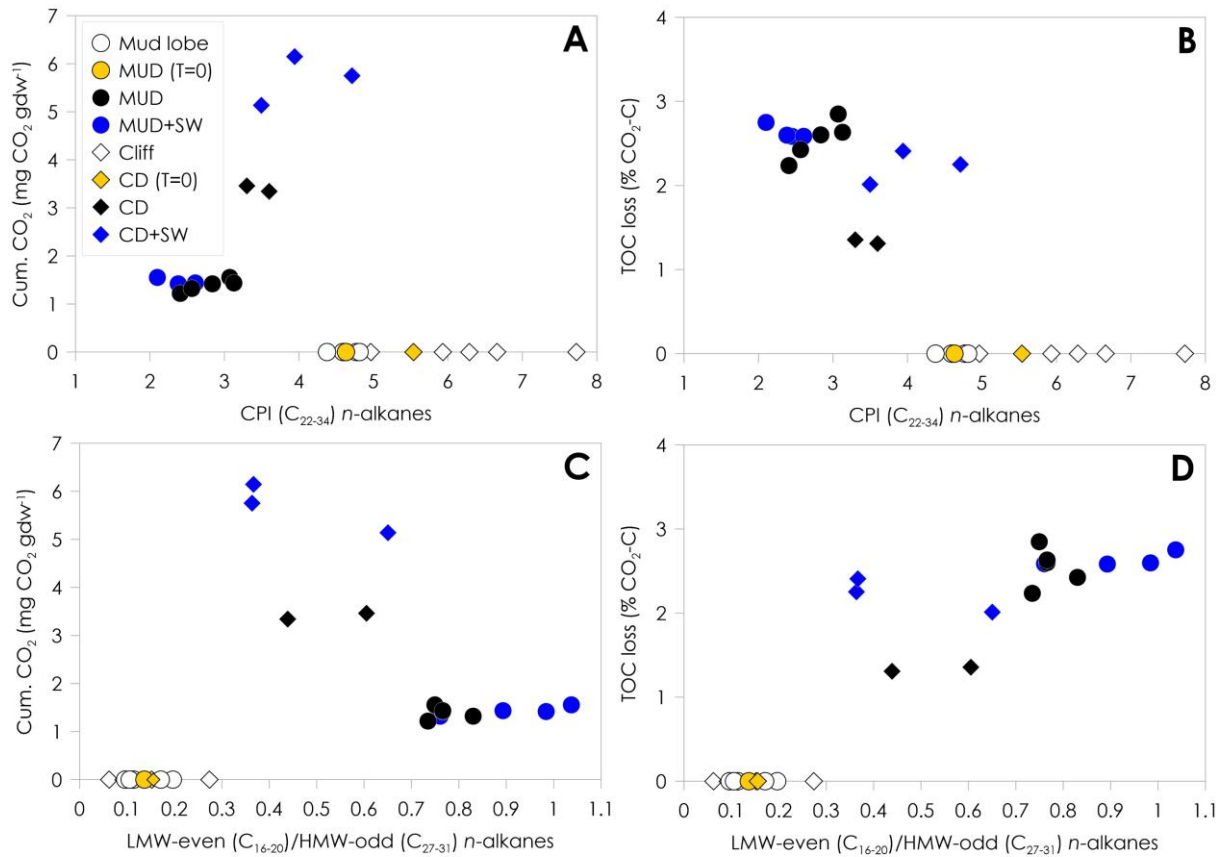

**Figure S7.** CO<sub>2</sub> production normalized to gram dry weight (gdw) and %TOC loss as CO<sub>2</sub>-C plotted against CPI *n*-alkanes (A, B) and LMW-even to HMW-odd *n*-alkane ratios (C, D). Open symbols on the x-axis indicate samples from *mud lobe* and *cliff* that were not incubated to show the natural variability in the *mud lobe* and *cliff*. The *mud debris* (MUD) and *cliff debris* (CD) samples used for the incubation (T = 0) are indicated by the yellow symbols, incubated samples by the black symbols and incubated samples with seawater (SW) added by the blue symbols.

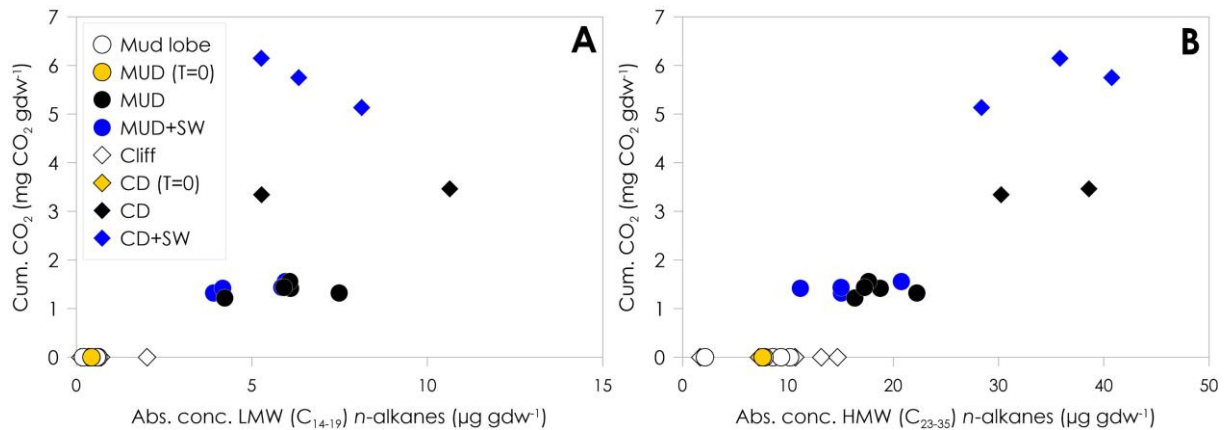

**Figure S8.** CO<sub>2</sub> production normalized to gram dry weight (gdw) plotted against absolute LMW *n*-alkane (A) and HMW *n*-alkane (B) concentrations. Open symbols on the x-axis indicate samples from *mud lobe* and *cliff* that were not incubated to show the natural variability in the *mud lobe* and *cliff*. The *mud debris* (MUD) and *cliff debris* (CD) samples used for the incubation (T = 0) are indicated by the yellow symbols, incubated samples by the black symbols and incubated samples with seawater (SW) added by the blue symbols.



**Table S2.** Summary of DOC concentrations and pH for incubation set-ups with *mud debris* (MUD) (n = 5), MUD with seawater (SW) (n = 5), *cliff debris* (CD) (n = 3) and CD with SW (n = 3) after two months of incubation (T = 1). DOC concentration and pH are given from mineral (PFMIN) and organic-rich (PFORG) permafrost mixed with seawater after four months (T = 1\*) are displayed to give a reference to local *in situ* permafrost and taken from Tanski et al. (2019). All values are given as mean  $\pm$  standard deviation.

|                             | SW<br>(T=0)      | SW<br>(T=1)      | MUD+SW<br>(T=1)                 | CD+SW<br>(T=1)                  |
|-----------------------------|------------------|------------------|---------------------------------|---------------------------------|
| <b>This study</b>           |                  |                  |                                 |                                 |
| DOC (mg L <sup>-1</sup> )   | 1.7<br>$\pm 0.0$ | 2.6<br>$\pm 1.0$ | 7.2<br>$\pm 0.1$                | 27.8<br>$\pm 1.0$               |
| pH                          | 8.2<br>-         | 8.2<br>$\pm 0.1$ | 7.0<br>$\pm 0.1$                | 7.0<br>$\pm 0.0$                |
|                             | SW<br>(T=0)      | SW<br>(T=1*)     | PF <sub>MIN</sub> +SW<br>(T=1*) | PF <sub>ORG</sub> +SW<br>(T=1*) |
| <b>Tanski et al. (2019)</b> |                  |                  |                                 |                                 |
| DOC (mg L <sup>-1</sup> )   | 1.3<br>$\pm 0.0$ | 2.2<br>$\pm 0.2$ | 11.6<br>$\pm 3.9$               | 52.7<br>$\pm 6.5$               |
| pH                          | 8.2<br>$\pm 0.0$ | 8.5<br>$\pm 0.1$ | 7.6<br>$\pm 0.1$                | 5.2<br>$\pm 0.2$                |



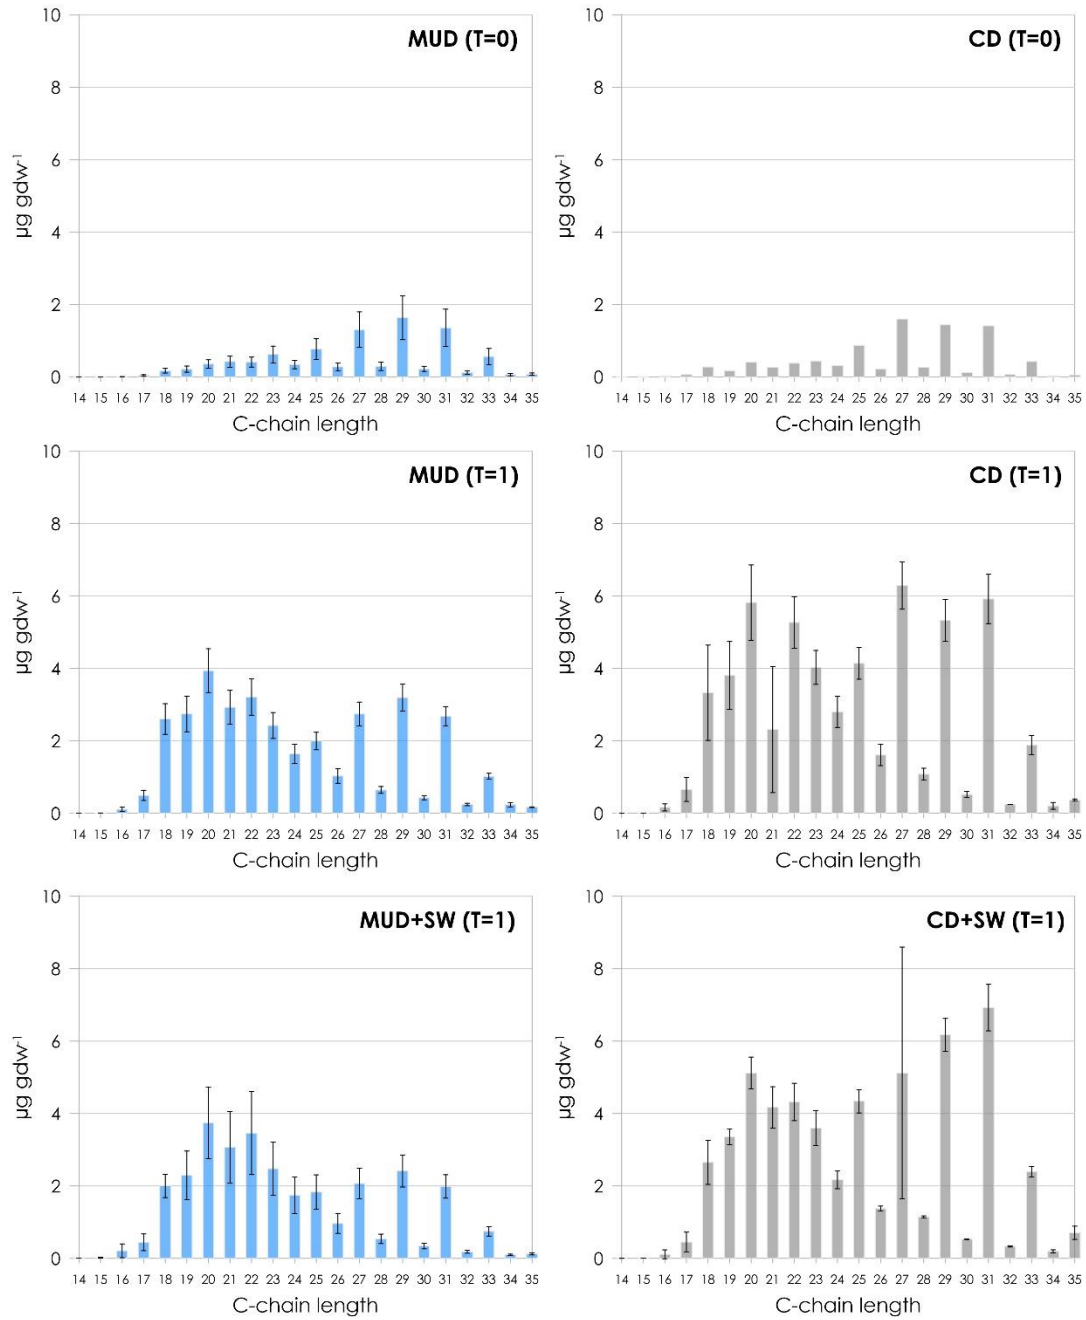

**Figure S9.** Bar graphs showing the distribution of *n*-alkane carbon chains in *mud debris* (MUD), *cliff debris* (CD) and set-ups incubated with seawater (SW). The upper panels show the *n*-alkane distribution before the incubation (T=0) and the middle and lower panels after the incubation (T=1).

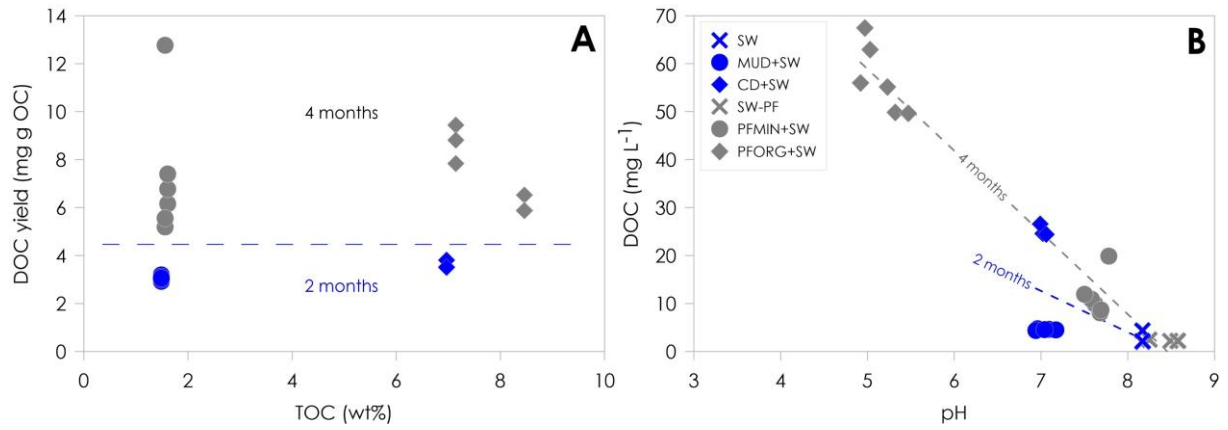

**Figure S10.** Scatter plots showing correlation between initial TOC contents and DOC yield (a) as well as pH and DOC concentration (b) of *mud debris* (MUD) and *cliff debris* (CD) in seawater (SW) after the incubation of two months. As reference for local permafrost, correlations are also displayed for mineral (PF<sub>MIN</sub>) and organic-rich permafrost (PF<sub>ORG</sub>) samples and seawater (SW-PF) incubated for four months (Tanski et al., 2019).
